# Supplementary material for: Lithium nickel manganese cobalt oxide particles cause developmental neurotoxicity in Caenorhabditis elegans
Source: Royal Society of Chemistry journal article supplement (doi:10.1039/d5va00103j), 2025-01-01
Supplement: d5va00103j1.pdf [file d5va00103j1.pdf]

**Lithium Nickel Manganese Cobalt Oxide Particles Cause Developmental Neurotoxicity in *Caenorhabditis elegans***

Roi Faroud Lopez<sup>1†</sup>, Javier Huayta<sup>1†</sup>, Gordon D.Z. Williams<sup>1</sup>, Sarah A. Seay<sup>1</sup>, Pooja D. Lalwani<sup>1</sup>, Sasha Bacot<sup>1</sup>, Avner Vengosh<sup>1</sup>, Joel N. Meyer<sup>1\*</sup>

<sup>1</sup>Nicholas School of the Environment, Duke University, Durham NC

\*Corresponding author

†These authors contributed equally to this work.

**Supplementary information**

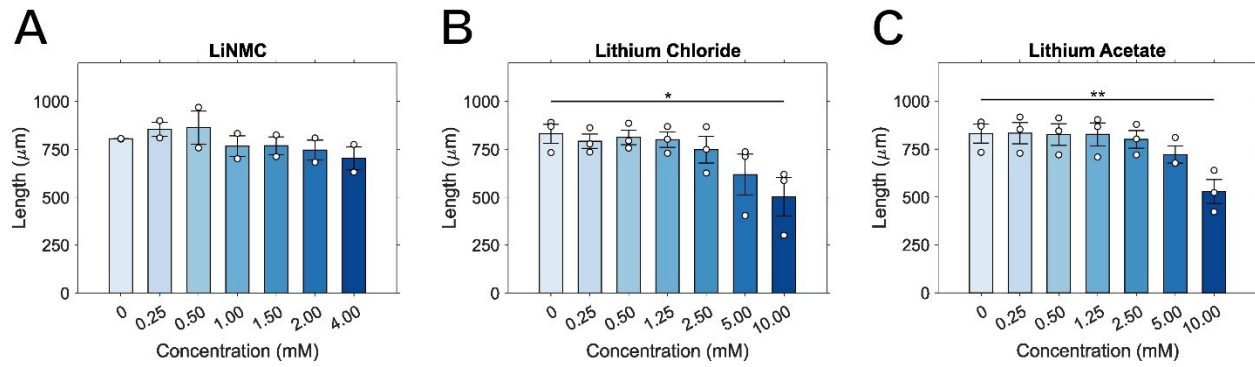

**Figure S1: Length of worms after exposure to lithium compounds.** Length of worms exposed during larval development to A) LiNMC, B) lithium chloride, or C) lithium acetate in liquid culture. One-way ANOVA with Dunnet's test, error bars are SEM,  $n = 3$  biological replicates for lithium chloride and acetate, 2 biological replicates for LiNMC (150 - 300 worms per treatment), (\*)  $p < 0.05$ , (\*\*)  $p < 0.01$ .

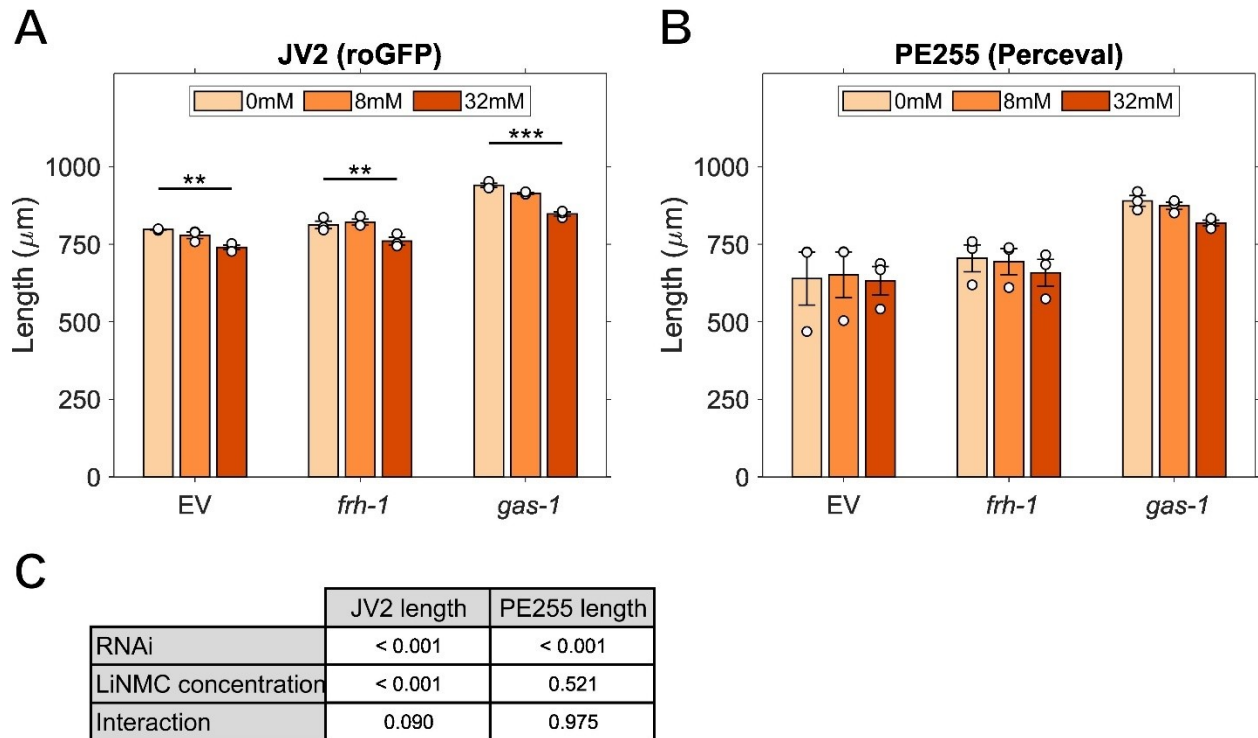

**Figure S2: Length of worms (not normalized) after exposure to LiNMC and fed RNAi.** A) JV2 strain (roGFP reporter) and B) PE255 strain (Perceval reporter). C) Summary of the main effects of RNAi and LiNMC concentration in chemical uptake in worms. Two-way ANOVA with Tukey-HSD test,  $n = 3$  biological replicates (100 worms per treatment), error bars are SEM, (\*\*)  $p < 0.01$ , (\*\*\*)  $p < 0.001$ . Note that *gas-1* worms were grown for 72 hours, vs 48 hours for N2 and *frh-1*, which is why they are larger (growth of *gas-1* worms is approximately 12 hours delayed at 48 hours post-hatch).

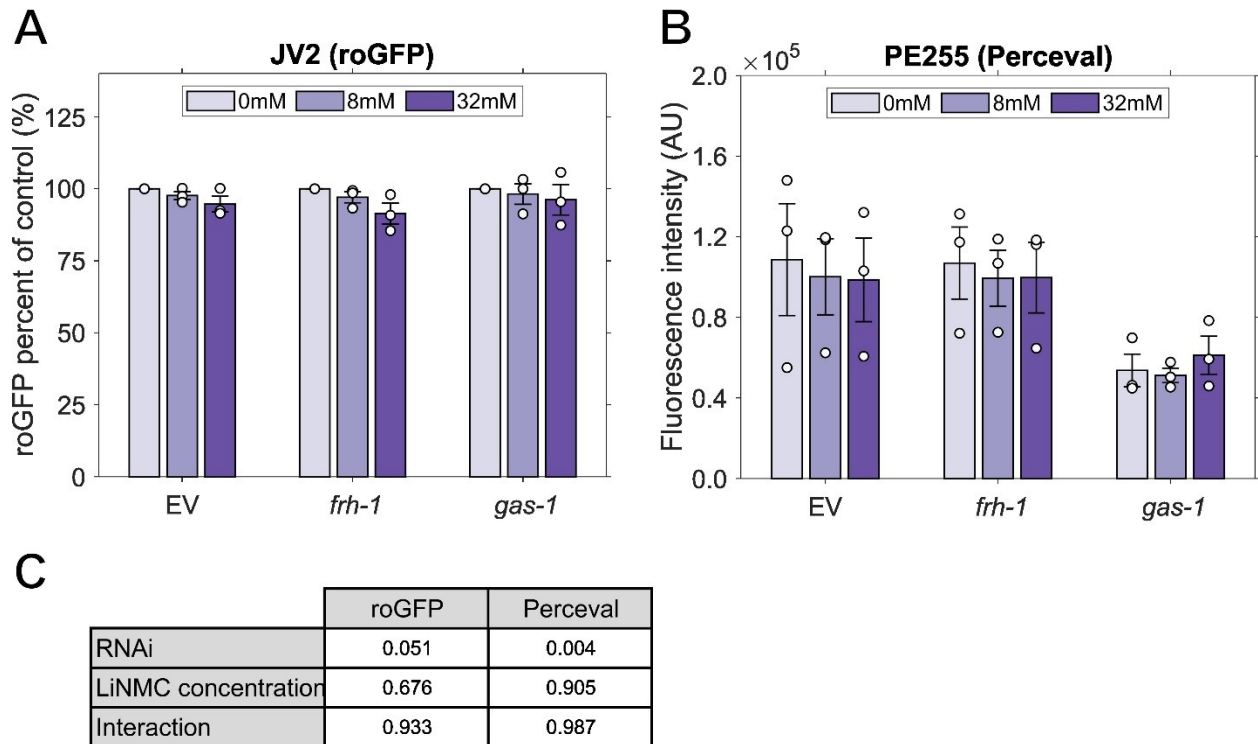

**Figure S3: roGFP and ATP (not normalized) after exposure to LiNMC and fed RNAi.** A) JV2 strain (roGFP reporter) and B) PE255 strain (Perceval reporter). C) Summary of the main effects of RNAi and LiNMC concentration in chemical uptake in worms. Two-way ANOVA with Tukey-HSD test,  $n = 3$  biological replicates (100 worms per treatment).

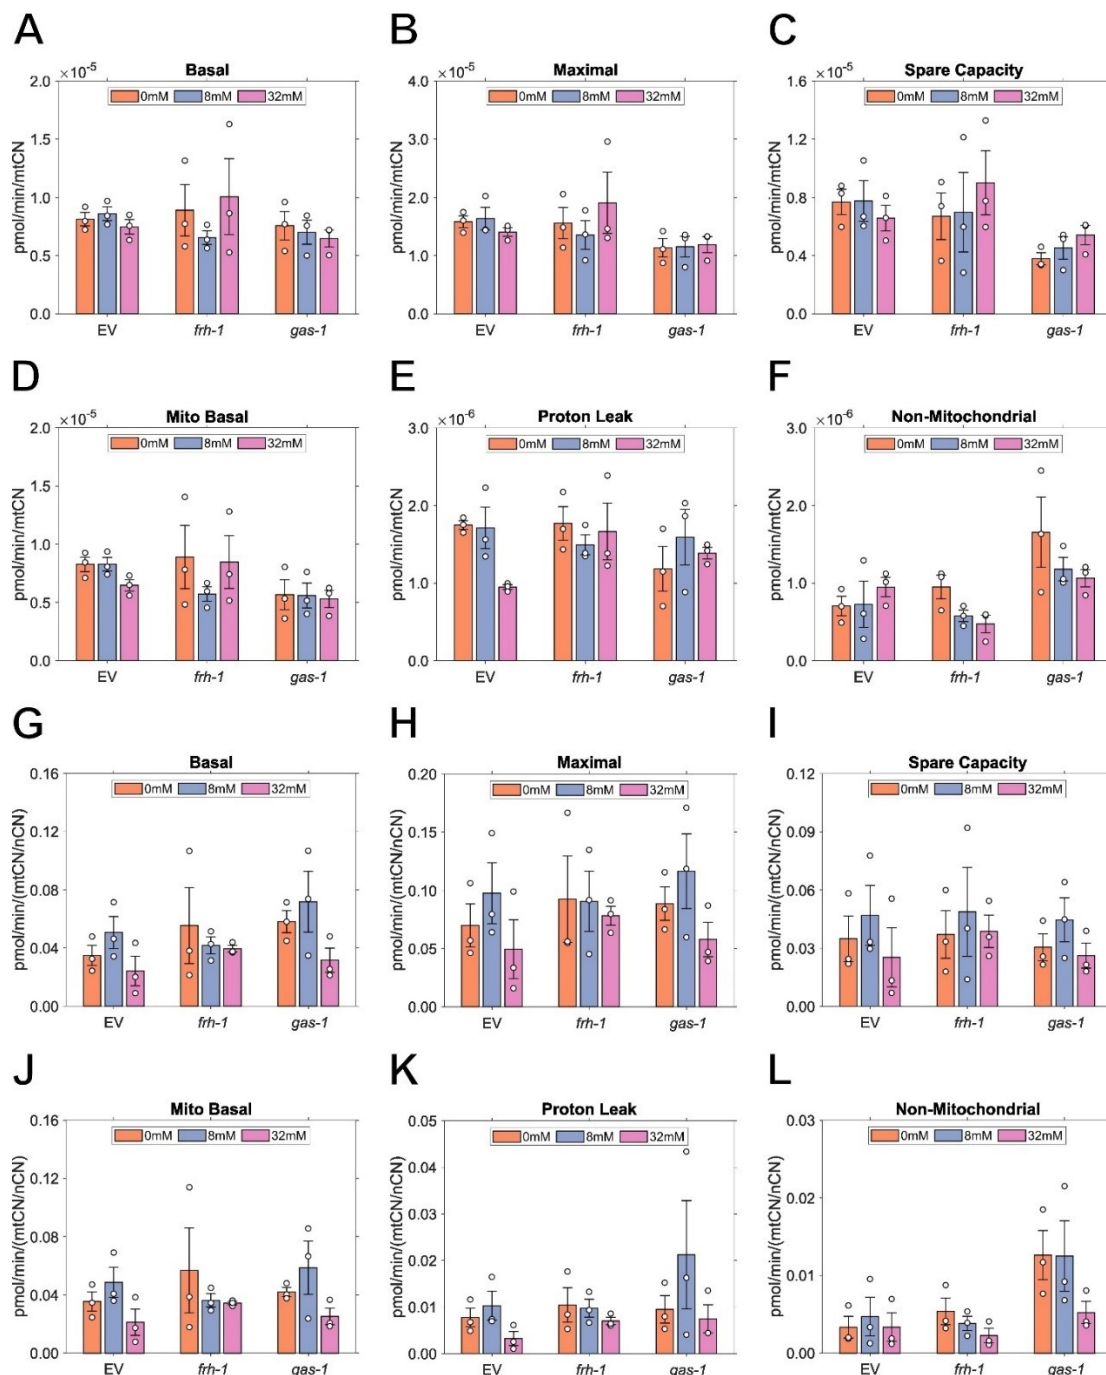

**Figure S4: Additional OCR normalized to mtDNA copy number and the mtDNA to nDNA copy number ratio.** Comparison of A) basal OCR, B) maximal OCR, C) spare OCR capacity, D) mitochondrial basal OCR, E) proton leak, and F) non-mitochondrial respiration between groups exposed to either 0, 8, or 32 mM LiNMC, and fed empty vector (EV), *frh-1* or *gas-1* RNAi bacteria and normalized to mtDNA copy number. Comparison of G) basal OCR, H) maximal OCR, I) spare OCR capacity, J) mitochondrial basal OCR, K) proton leak, and L) non-mitochondrial respiration between groups exposed to either 0, 8, or 32 mM LiNMC, and fed empty vector (EV), *frh-1* or *gas-1* RNAi bacteria and normalized to mitochondrial:nuclear DNA copy number. Two-way ANOVA with Tukey-HSD; error bars are SEM, n = 3 biological replicates (5 technical replicates per biological replicate, 20 - 30 L4 worms per technical replicate).

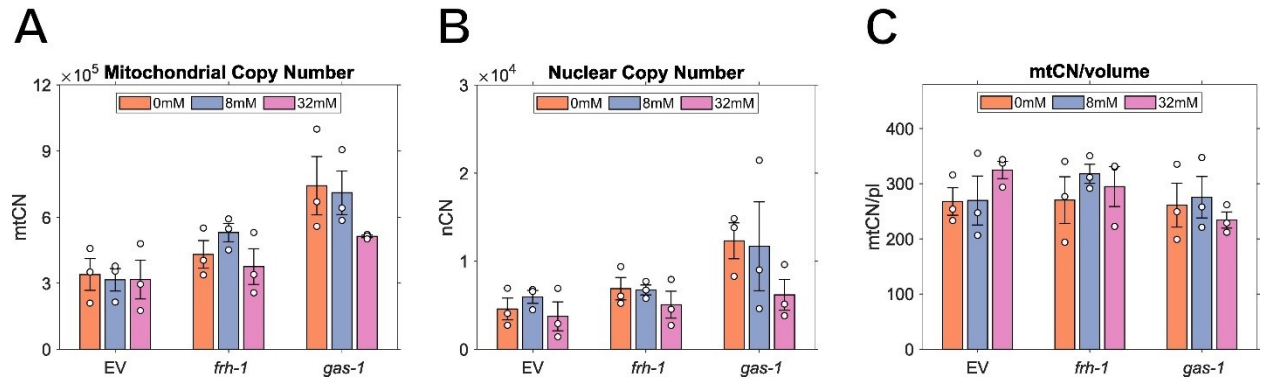

**Figure S5: Additional DNA copy number visualization.** A) Mitochondrial copy number, B) nuclear copy number, and C) mitochondrial copy number normalized to worm volume. Two-way ANOVA with Tukey-HSD; error bars are SEM,  $n = 3$  biological replicates (5 technical replicates per biological replicate, 6 L4 worms per technical replicate).

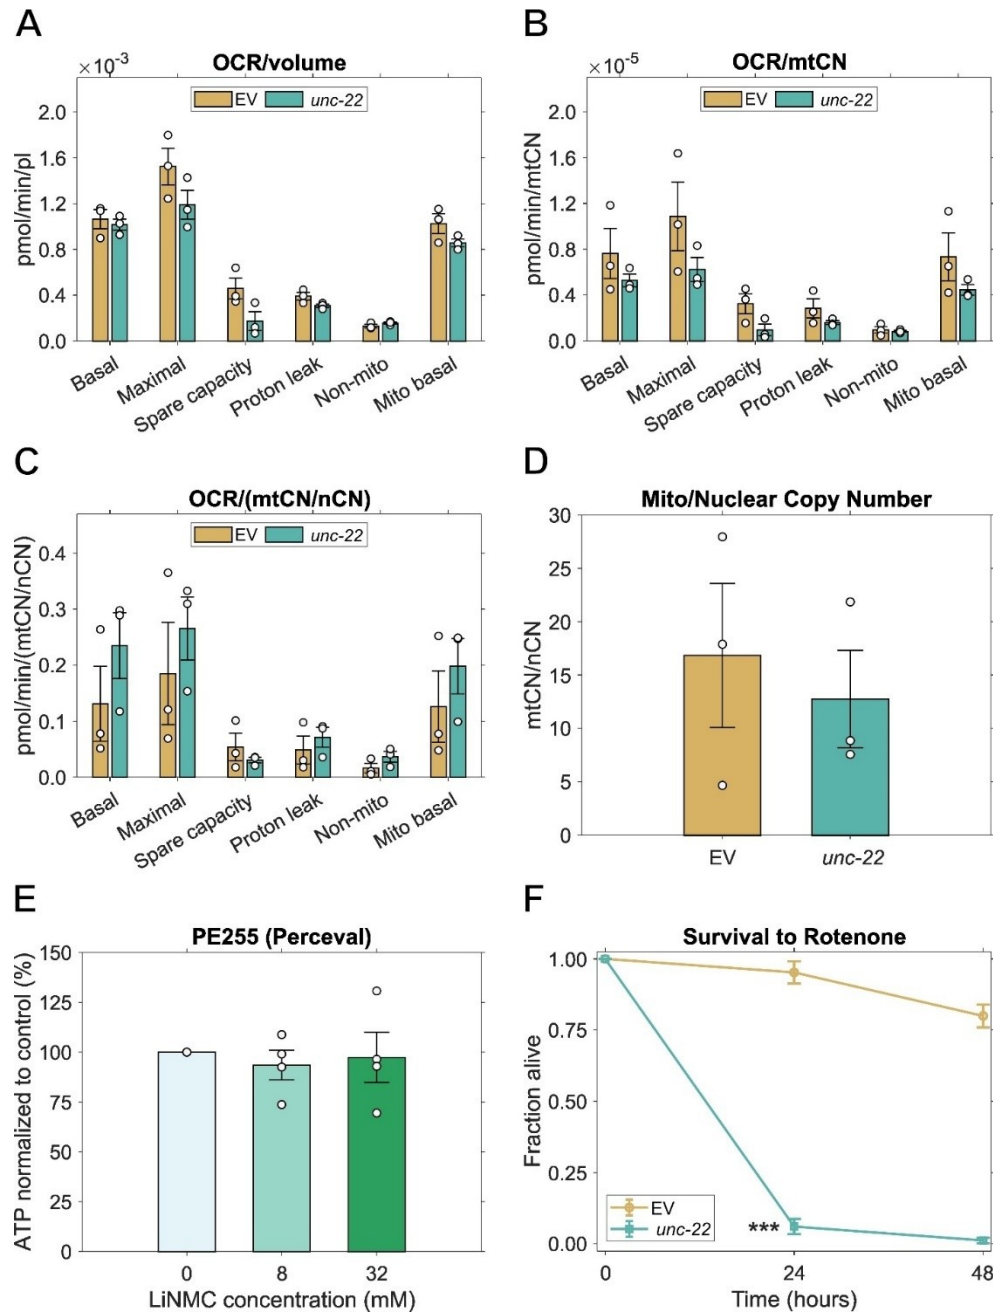

**Figure S6: Characterization of the *unc-22* positive control used for RNAi experiments.** A) OCR normalized to worm volume, B) OCR normalized to mitochondrial DNA copy number, C) OCR normalized to the mitochondrial:nuclear DNA copy number ratio, D) comparison of mitochondrial:nuclear DNA copy number, E) ATP normalized to control in PE255 strain (Perceval reporter) after exposure to LiNMC, and F) Survival to rotenone curves for worms fed empty vector or *unc-22* RNAi. Two-way ANOVA with Tukey-HSD for A, B, and C; One-way ANOVA with Dunnet's test for D and E; log-rank test for F; Error bars are SEM; n = 3 biological replicates (5 technical replicates per biological replicate, 20 - 30 L4 worms per technical replicate) for A, B, and C; n = 3 biological replicates (5 technical replicates per biological replicate, 6 L4 worms per technical replicate) for D; n = 4 biological replicates for E; and n = 3 biological replicates (100 worms per replicate); (\*\*\*)  $p < 0.001$ .

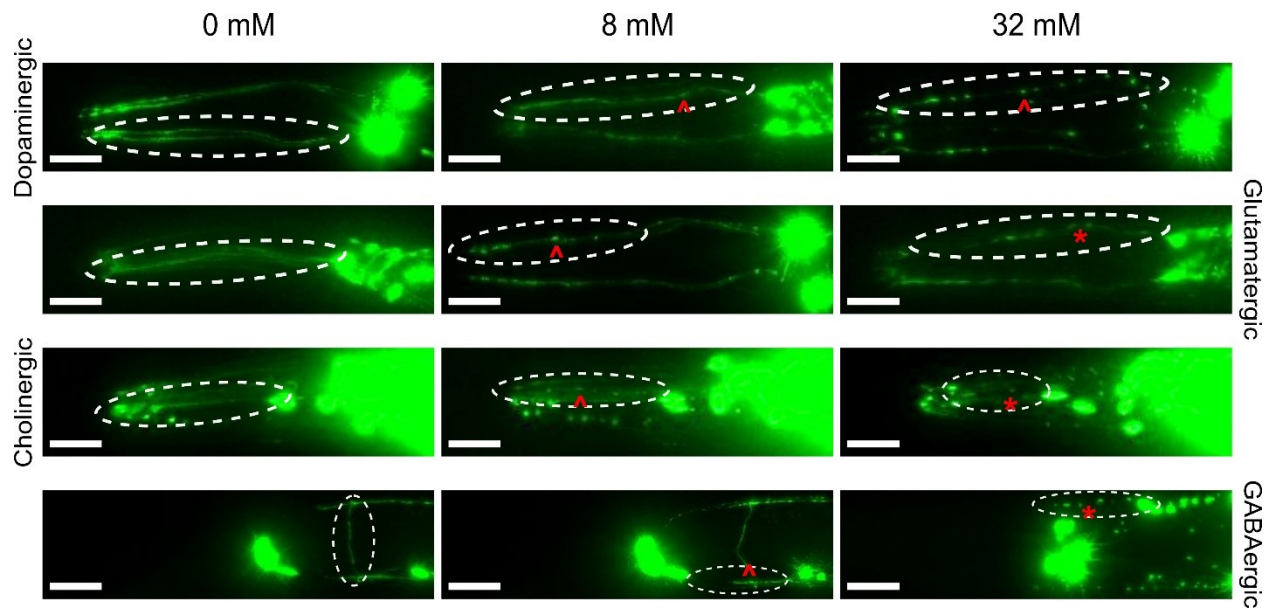

**Figure S7: Morphological damage observed in neurons after exposure.** Representative images of cephalic neurites under control conditions or after parental exposure to 8 mM or 32 mM LiNMC for dopaminergic, glutamatergic, cholinergic, and GABAergic neurons. White dashed circles delineate the regions scored, with examples of presence of blebs (red arrows) and breaks (red asterisks) for LiNMC exposures. Scale bars 20  $\mu$ m.



**Table S1: Elemental concentrations ( $\mu\text{M}$ ) in worms exposed to LiNMC and fed RNAi containing bacteria.**

|    | Empty vector |           |           | <i>frh-1</i> RNAi |           |           | <i>gas-1</i> RNAi |           |           |
|----|--------------|-----------|-----------|-------------------|-----------|-----------|-------------------|-----------|-----------|
|    | 0 mM         | 8 mM      | 32 mM     | 0 mM              | 8 mM      | 32 mM     | 0 mM              | 8 mM      | 32 mM     |
| Na | 14703.957    | 16020.733 | 19752.947 | 15299.706         | 18607.660 | 20176.830 | 13096.046         | 12977.839 | 16047.997 |
| Mg | 4337.347     | 4980.859  | 6484.415  | 4525.568          | 4396.488  | 4890.320  | 3014.032          | 3322.734  | 3130.138  |
| Al | 145.972      | 201.150   | 508.801   | 94.397            | 96.863    | 221.517   | 48.349            | 119.093   | 68.969    |
| P  | 43461.925    | 48780.077 | 50697.465 | 43895.198         | 44667.015 | 46349.289 | 32036.361         | 33806.393 | 34044.398 |
| K  | 30479.166    | 35384.848 | 35808.877 | 31418.148         | 32599.155 | 33579.449 | 20232.774         | 20555.479 | 21252.190 |
| Ca | 5409.594     | 6998.811  | 77164.112 | 5884.066          | 5755.606  | 6604.098  | 5774.864          | 14004.121 | 6115.173  |
| Fe | 83.383       | 84.513    | 217.081   | 83.833            | 63.354    | 70.967    | 62.194            | 60.972    | 55.781    |
| Cu | 2.065        | 5.449     | 6.534     | 4.507             | 1.856     | 2.305     | 1.709             | 2.045     | 2.115     |
| Zn | 82.685       | 96.895    | 92.236    | 90.075            | 84.394    | 84.658    | 61.321            | 62.374    | 58.844    |
| Se | <0.586       | <0.612    | <0.776    | <0.454            | <0.441    | <0.590    | <0.271            | <0.290    | <0.360    |
| Mo | <0.851       | <0.890    | <1.127    | <0.660            | <0.641    | <0.858    | <0.383            | <0.419    | <0.491    |
